# Supplementary material
Source: MDPI journal article supplement (https://www.mdpi.com/2073-4395/14/1/41)
Supplement: s1 [file s1]

## Supplementary Data

### Agronomic and physiological performance of the indica rice varieties differing in tolerance to low phosphorus

**Table S1.** Tested cultivars in the study

| Age of application | Variety                | Plant height (cm) | Growth duration(d) | Yield (t hm <sup>-2</sup> ) <sup>a</sup> |
|--------------------|------------------------|-------------------|--------------------|------------------------------------------|
| 1940-1950          | Huangguaxian (HGX)     | 169.80            | 118                | 3.12                                     |
| 1940-1950          | Yingtiaoxian (YTX)     | 136.20            | 117                | 3.28                                     |
| 1940-1950          | Nanjing 1 (NJ 1)       | 156.50            | 117                | 3.49                                     |
| 1960 -1970         | Taizhongxian (TZX)     | 108.50            | 130                | 6.70                                     |
| 1960 -1970         | Nanjing 11 (NJ 11)     | 100.20            | 122                | 7.85                                     |
| 1960-1970          | Zhenzhuai (ZZA)        | 118.00            | 127                | 5.99                                     |
| 1970-1980          | IR24                   | 126.20            | 122                | 7.40                                     |
| 1980-1990          | Yangdao 2 (YD 2)       | 110.50            | 145                | 7.91                                     |
| 1980-1990          | Yangdao 6 (YD 6)       | 114.60            | 146                | 7.82                                     |
| 1990-2000          | Yangliangyou 6 (YLY 6) | 116.20            | 153                | 8.99                                     |
| 2000-              | Liangyoupeijiu (LYPJ)  | 121.00            | 152                | 9.97                                     |
| 2000-              | Ilyou 084 (IIY 084)    | 121.80            | 153                | 9.77                                     |

<sup>a</sup> Yiled performance is observed in paddy field condition.

**Table S2.** Hydroponic culture method

| Nutrient type | Compound                                             | Transplanting to 10<br>days after | 10 days after<br>transplanting | Heading stage<br>to maturity |
|---------------|------------------------------------------------------|-----------------------------------|--------------------------------|------------------------------|
|               |                                                      | Full-strength<br>solution (g)     | 1/2 strength solution<br>(g)   | 1/4 strength<br>solution (g) |
| Macronutrient | (NH <sub>4</sub> ) <sub>2</sub> SO <sub>4</sub>      | 405.72                            | 202.86                         | 101.43                       |
|               | Ca(NO <sub>3</sub> ) <sub>2</sub> ·4H <sub>2</sub> O | 736.92                            | 368.46                         | 184.23                       |
|               | H <sub>3</sub> PO <sub>4</sub> (ml) <sup>a</sup>     | 127.35                            | 63.68                          | 31.84                        |
|               | KCl                                                  | 154.24                            | 77.12                          | 38.56                        |
|               | MgSO <sub>4</sub> ·7H <sub>2</sub> O                 | 2070.00                           | 1035.00                        | 517.50                       |
| Micronutrient | H <sub>3</sub> BO <sub>3</sub>                       | 23.68                             | 11.84                          | 5.92                         |
|               | ZnSO <sub>4</sub> ·7H <sub>2</sub> O                 | 1.82                              | 0.91                           | 0.46                         |
|               | MnCl <sub>2</sub> ·4H <sub>2</sub> O                 | 14.99                             | 7.49                           | 3.75                         |
|               | CuSO <sub>4</sub> ·5H <sub>2</sub> O                 | 0.66                              | 0.33                           | 0.17                         |
|               | H <sub>2</sub> MoO <sub>4</sub> ·H <sub>2</sub> O    | 0.17                              | 0.08                           | 0.04                         |
|               | FeSO <sub>4</sub> ·7H <sub>2</sub> O                 | 62.50                             | 31.25                          | 15.63                        |
|               | EDTA Na                                              | 67.00                             | 33.50                          | 16.75                        |

<sup>a</sup> The content of phosphorus in the full-strength solution was 8.02 mg L<sup>-1</sup>
